# Supplementary material
Source: Springer Nature journal article supplement (https://www.springermedizin.de/resource/supplementary/12913_2013_3082_MOESM1_ESM.pdf/9532392)
Supplement: MOESM1 [file 9532392]

### **Changes to the clinical encounter**

Less face-to-face contacts causing loss of personal touch and contributing to the fear of missing important symptoms of health deterioration

Feeling apprehensive regarding data physiological data being analysed by a new member of staff

### **Changes to the skills and expertise**

Technical issues arising during installation, equipment breakdown

Knowledge and ability issues arising due to inadequate, untimely, and poorly conceived training

### **Changes to the clinical routines**

Added workload resulting from patient selection and training, and equipment installation

For nurses and CMs, training of CSWs also added to their already existing workload

Patient monitoring through telephone than personal visit

```
graph TD; A[Changes to the clinical encounter] --> D[Experience of threat]; B[Changes to the skills and expertise] --> D; C[Changes to the clinical routines] --> D;
```

**Experience of threat**
